# Supplementary material
Source: HighWire-hosted journal article supplement (https://care.diabetesjournals.org/content/suppl/2005/08/26/28.9.2113)
Supplement: dc0589OnlineAppendix.pdf [file dc0589OnlineAppendix.pdf]

## Online Appendix– Marketed Beta-blockers in Canada

acebutalol

atenolol

atenolol/chlorthalidone

carvedilol

labetalol

metoprolol

nadolol

exprenolol

pindolol

pindolol/hydrochlorothiazide

propranolol

propranolol/hydrochlorothiazide

sotalol

timolol

timolol/ hydrochlorothiazide
